# Supplementary material for: A Novel Symbiotic Formulation Reduces Obesity and Concomitant Metabolic Syndrome in Rats by Raising the Relative Abundance of Blautia
Source: Nutrients. 2023 Feb 14;15(4):956. doi: 10.3390/nu15040956 (PMC9960556; doi:10.3390/nu15040956)
Supplement: Supplementary file 1 [file nutrients-15-00956-s001.zip › Supplementary Materials/TableS1.xlsx]

## Sheet: Sheet1
Table S1 The exact formula of the symbiotic
Probiotics	Density (CFU/g)	each rat/day (g)
		High dose	Low dose
B. animalis ssp. lactis 420	4*10^11	0.003	0.0003
B. breve B-3	1*10^11	0.005	0.0005
L. acidophilus JYLA-191	1*10^11	0.01	0.001
L. rhamnosus JYLR-005	1*10^11	0.01	0.001
L. plantarum JYLP-002	1*10^11	0.01	0.001
Prebiotics
apple pectin	-	0.03	0.003
cranberry powder	-	0.15	0.015
inulin	-	0.5	0.05
fructo-oligosaccharides	-	0.5	0.05
