# Supplementary material for: A Novel Symbiotic Formulation Reduces Obesity and Concomitant Metabolic Syndrome in Rats by Raising the Relative Abundance of Blautia
Source: Nutrients. 2023 Feb 14;15(4):956. doi: 10.3390/nu15040956 (PMC9960556; doi:10.3390/nu15040956)
Supplement: Supplementary file 1 [file nutrients-15-00956-s001.zip › Supplementary Materials/TableS2.xlsx]

## Sheet: Sheet2
Table S2: Totally 65 characteristic metabolic molecules based on the results of the OPLS-DA model of all samples.
Case ID	(E)-8-Methyl-6-nonenoic-acid	10-Hydroxy-2-Decenoic Acid	12-Hydroxyoctadecanoic acid	2,4-Quinolinediol	3-(3-Hydroxyphenyl)Propionate Acid	3-Hydroxykynurenine	3-Indolepropionic Acid	4-Acetylaminobenzoic acid	6-aminonicotinamide	Asn-Hyp	Butenoyl-PAF	C8-neuroamine-(d18:1/8:0)	Carnitine C10:1	Carnitine C11:1	Carnitine C12:1	Carnitine C13:0	Carnitine C14:2-OH	Carnitine C16:3	Carnitine C18-OH	Carnitine C18:0	Carnitine C18:2-OH	Carnitine C20:1-OH	Carnitine C6:DC	Carnitine C8:1	Carnitine C9:1-OH	Cyclo(Pro-Val)	Dodecylbenzenesulfonic acid	EPA	Equol	FFA(10:1)	FFA(18:4)	Hippuric Acid	Indoleacrylic acid	LPC(0:0/15:0)	LPC(0:0/16:1)	LPC(0:0/17:0)	LPC(0:0/20:1)	LPC(0:0/20:2)	LPC(0:0/20:5)	LPC(13:0/0:0)	LPC(15:0/0:0)	LPC(16:1/0:0)	LPC(17:0/0:0)	LPC(20:1/0:0)	LPC(20:2/0:0)	LPC(20:5/0:0)	LPC(O-0:0/18:0)	LPC(O-18:0/0:0)	LPE(0:0/18:0)
ND1	293246	9	55418.8	971909	20537.4	70183	1.82687e+06	2.46256e+06	188418	52802.6	250770	9	218974	9	30699.4	183421	90711.6	149481	142570	906936	149405	26135.6	7335.08	410345	872419	52279.9	9	294656	35039	119484	92805.5	1.71265e+06	165209	2.83632e+07	5.17631e+07	8.69532e+07	250770	4.37953e+06	862430	52646.6	2.83632e+07	5.17631e+07	6.42161e+07	250770	4.37953e+06	862430	12179.3	12179.3	1.06628e+07
ND2	210806	9	50750.9	1.03371e+06	26539.2	178718	3.9266e+06	2.55146e+06	228763	39350.3	214545	9	226011	45013.5	59658.7	187103	178070	287462	157863	1.30955e+06	218914	33805	19488.9	610814	1.44937e+06	35378.6	23501.4	405056	87042.9	99770.8	110034	2.23386e+06	238163	2.94022e+07	5.25718e+07	8.56068e+07	214545	3.41428e+06	1.06338e+06	49041.8	2.94022e+07	5.25718e+07	6.38647e+07	214545	3.41428e+06	1.06338e+06	13684.9	13684.9	8.7177e+06
ND3	219532	9	57193.7	965018	22619.9	39509.9	5.55461e+06	2.43413e+06	174635	70305.4	368476	9	204133	9	53940.8	117161	134713	254448	168520	1.02305e+06	189897	40458	9639.37	396691	1.09383e+06	49972.1	9	600796	44113.4	91125.2	178094	1.57355e+06	370885	4.32457e+07	7.90051e+07	8.80878e+07	368476	9.47652e+06	1.10179e+06	70842.1	4.32457e+07	7.90051e+07	6.97674e+07	368476	9.47652e+06	1.10179e+06	16100.8	16100.8	1.56961e+07
ND4	168300	67287.9	34539.2	785538	23303.3	42838.4	4.85312e+06	1.30112e+06	120814	45320.6	478753	9	126192	9	28209.6	206381	76885.6	145654	136628	1.02163e+06	168277	29260	13871.1	255889	1.27568e+06	53323.6	27331.8	229566	14314.1	90311	75718	835480	263749	3.54259e+07	5.27957e+07	8.32143e+07	478753	5.79627e+06	1.01752e+06	43168.8	3.54259e+07	5.27957e+07	6.96215e+07	478753	5.79627e+06	1.01752e+06	17287.4	17287.4	1.4235e+07
ND5	198257	9	51355.5	849664	42111.6	103406	3.14943e+06	5.99294e+06	170075	68057.5	360611	9	141040	9	42104.3	149636	94966	183134	152280	1.05631e+06	120930	35774.3	13872.9	496260	831934	45704.7	9	201596	35154.7	119677	59798.1	4.24357e+06	294226	3.60665e+07	8.44633e+07	8.47876e+07	360611	7.22359e+06	1.82449e+06	80129.9	3.60665e+07	8.44633e+07	6.57245e+07	360611	7.22359e+06	1.82449e+06	16202.3	16202.3	1.28188e+07
ND6	204064	9	84439.1	818289	48690.8	78040.1	5.97396e+06	2.82762e+06	263840	26233.5	196515	9	182319	9	44469.9	253512	133306	215739	136546	935550	184877	30189.5	9554.2	297851	725116	38672.2	9	334315	36113.1	110210	108181	2.13443e+06	463188	3.15256e+07	1.1831e+08	77536906	196515	6.72895e+06	1.06105e+06	64364.5	3.15256e+07	1.1831e+08	6.22332e+07	196515	6.72895e+06	1.06105e+06	18456.9	18456.9	1.0421e+07
ND7	232776	9	47205.4	854250	71420.1	110885	7.59509e+06	4.44637e+06	218532	42926.3	277342	9	197160	9	68863.9	120314	186523	284786	123240	766080	167638	28097.9	22278.5	407175	590886	65660.5	9	339241	86884.4	160680	91770.5	3.64614e+06	850871	3.36303e+07	9.58634e+07	8.70976e+07	277342	6.34843e+06	1.54411e+06	75744.6	3.36303e+07	9.58634e+07	7.15719e+07	277342	6.34843e+06	1.54411e+06	14066.1	14066.1	9.42731e+06
ND8	305483	21969.4	50548.3	907667	49049.3	37057.7	6.06988e+06	2.96962e+06	251948	29817.9	389650	9	218148	9	55709.3	130229	108079	207390	106559	833589	149528	25639	7334.22	596820	655751	65366	31713.4	543499	24465.1	128836	203414	2.05869e+06	484952	3.39677e+07	6.74346e+07	8.10061e+07	389650	8.31644e+06	797064	44757.3	3.39677e+07	6.74346e+07	7.14953e+07	389650	8.31644e+06	797064	10500.7	10500.7	7.78919e+06
HFD_C1	163043	63823.4	9	945347	15537.1	9	478293	1.40879e+06	166392	23855	92107.1	26635.1	103409	21184.3	80733.7	70106.7	72893.1	119684	162563	1.74072e+06	65340.5	49501.2	9	243724	323671	68106.1	34652.2	122323	9	9	49646.5	1.20663e+06	55121.4	9.26263e+06	3.50349e+07	6.66194e+07	92107.1	2.07436e+06	401758	12482.9	9.26263e+06	3.50349e+07	4.86019e+07	92107.1	2.07436e+06	401758	16727.8	16727.8	1.16017e+07
HFD_C2	9	38010.7	19402.4	946928	8298.46	9	1.49425e+06	900557	47808.5	11922.6	262629	35230.7	143433	44051	85405.8	119196	51476.3	129073	340443	2.62034e+06	67161.9	108034	9	144945	690414	56126.6	27200.9	80789.7	9	9	22534	626809	143193	15383697	4.9473e+07	7.13038e+07	262629	2.3526e+06	583742	32573.6	15383697	4.9473e+07	5.60216e+07	262629	2.3526e+06	583742	32459.8	32459.8	1.86039e+07
HFD_C3	127166	47752.1	9	989326	21378.4	9	1.97197e+06	3.48877e+06	113003	20278	147868	33205.1	162854	37804.8	102599	51292.9	66025.4	164189	268214	2.71205e+06	112710	86444.6	9	289847	508058	107836	30099.9	195362	18331.6	57543.5	89693.5	2.58196e+06	186263	1.47436e+07	5.55653e+07	6.85577e+07	147868	4.18987e+06	328626	31608	1.47436e+07	5.55653e+07	5.59363e+07	147868	4.18987e+06	328626	37490.5	37490.5	1.85909e+07
HFD_C4	9	180589	9	927480	34609.8	9	2.41911e+06	2.89134e+06	201729	32187.4	217750	29736.7	84455.9	35814.8	86336.6	115325	81696.2	109588	268166	3.01008e+06	194447	69722.2	9	218951	517395	87617.1	25983.1	398614	34588.6	9	88020	1.87131e+06	237398	1.8027e+07	6.34236e+07	7.20376e+07	217750	5.01706e+06	327996	57494	1.8027e+07	6.34236e+07	5.35974e+07	217750	5.01706e+06	327996	39602.9	39602.9	2.05945e+07
HFD_C5	9	60210.4	71407.1	1.03554e+06	25319.6	9	2.34625e+06	1.76675e+06	73418.7	9228.85	157023	33187.8	73269.1	33170.3	75065.8	90312.4	43650.4	99367.3	327932	3.01464e+06	57523.5	82494.8	17024.4	200593	698585	82333.7	30087.2	104525	9	9	57196.1	1.05377e+06	295685	1.22925e+07	5.39097e+07	7.46353e+07	157023	4.33833e+06	333358	29635	1.22925e+07	5.39097e+07	5.98912e+07	157023	4.33833e+06	333358	42552.5	42552.5	2.02644e+07
HFD_C6	117323	82004.8	9	1.04616e+06	9686.02	9	1.89883e+06	687467	86309.4	9	231407	62184.6	135296	27130.5	110816	67781.4	72680	123481	295813	3.02786e+06	136424	87211.8	9	139765	480283	80984.2	34790.5	216421	9	48426	70031.7	525327	158357	1.34128e+07	4.90522e+07	7.53903e+07	231407	3.59329e+06	506958	53843.7	1.34128e+07	4.90522e+07	6.01861e+07	231407	3.59329e+06	506958	42109.3	42109.3	1.93412e+07
HFD_C7	9	86198.6	9	1.0059e+06	9936.46	105316	2.48277e+06	2.10771e+06	105829	9	183036	32061.6	80761.1	39753.5	57745.3	74682.5	41766.6	97610.7	270571	2.30308e+06	51938.7	64000.6	8133.98	209428	560580	113405	16643	104320	9	9	33776.7	1.27627e+06	261837	1.50416e+07	4.84947e+07	8.14115e+07	183036	4.3424e+06	353576	29481.1	1.50416e+07	4.84947e+07	6.25212e+07	183036	4.3424e+06	353576	53284.6	53284.6	1.77039e+07
HFD_C8	9	81946.5	9	1.08773e+06	10374.3	9	848180	804145	85255.5	16701	174498	32436.5	82657.4	14292.8	68417.3	51177.6	41169.4	84722.5	235845	2.16939e+06	56892.8	61689.6	15053.3	145316	414654	80290.3	24700.6	62069	9	9	38662.5	527903	144486	1.14352e+07	3.7558e+07	8.57207e+07	174498	3.40879e+06	302364	24536	1.14352e+07	3.7558e+07	6.47437e+07	174498	3.40879e+06	302364	31615.1	31615.1	1.75452e+07
HFD_L1	154455	50715	40259.2	1.03322e+06	9116.08	139493	1.50939e+06	964862	50573.5	12911.2	228524	44682.9	127311	34877.3	57973.3	78148.3	58610.3	116337	356305	2.95391e+06	83435.1	69147.2	9	178074	566776	69039.5	31328.2	110298	17910.9	9	41218.9	587209	129658	1.84012e+07	5.04282e+07	7.27794e+07	228524	2.69505e+06	496478	53236.1	1.84012e+07	5.04282e+07	5.85831e+07	228524	2.69505e+06	496478	34971.3	34971.3	2.57864e+07
HFD_L2	160497	73348.3	9	1.0078e+06	11640.3	24969.1	1.30143e+06	897238	69034	9	131569	22441.2	95722.8	51760.5	87695.4	49746.1	41004.7	123915	312393	2.14228e+06	77469	108198	9	146072	422893	69069	39348.4	108523	33929.2	50950.5	28660.2	504226	157972	1.43154e+07	4.72236e+07	6.96511e+07	131569	4.21488e+06	703982	39281.4	1.43154e+07	4.72236e+07	5.74693e+07	131569	4.21488e+06	703982	25264.3	25264.3	2.16293e+07
HFD_L3	247593	28705	9	1.01343e+06	7145.49	107027	883821	643333	141009	18917.5	326144	40796.1	135059	44691.5	107047	49725.7	86593.7	138872	301559	2.86588e+06	84553.5	77408.1	13489.9	211844	370727	73878.9	36169.6	79525.7	34938.5	93178.7	46708	576819	110871	1.13125e+07	4.31122e+07	7.03376e+07	326144	4.21183e+06	302846	26068.2	1.13125e+07	4.31122e+07	5.49334e+07	326144	4.21183e+06	302846	37619.3	37619.3	2.01988e+07
HFD_L4	190599	81033.9	32005.5	1.05227e+06	10565.3	41019.7	1.64026e+06	1.71709e+06	100072	9	339656	31451.3	151510	28729.3	66527.2	92407.2	65135	104921	250625	2.62665e+06	72163.2	71189.4	9	307931	513537	89332	35994	192746	27353	93394.4	75468.4	1.20115e+06	265731	1.41055e+07	6.15734e+07	7.32347e+07	339656	5.30611e+06	321834	21260.3	1.41055e+07	6.15734e+07	5.42004e+07	339656	5.30611e+06	321834	27430.4	27430.4	2.83932e+07
HFD_L5	212356	64029.5	9	1.02397e+06	11209	56265.8	927112	630546	68874.9	9	187193	34502.5	77807.2	21357.9	74124.1	58204	38099.8	69542.4	192060	2.35752e+06	50585.6	44987.7	8482.05	61184.8	375657	61160	27488	136076	10878.7	73299.8	34882.8	394875	77632.5	1.19487e+07	3.88486e+07	7.03331e+07	187193	2.72402e+06	349272	24118	1.19487e+07	3.88486e+07	5.58287e+07	187193	2.72402e+06	349272	29130.1	29130.1	1.52809e+07
HFD_L6	193966	79816.1	9	965782	9315.82	53598.5	732529	1.0442e+06	73795	8352.3	220807	38626.4	148340	23296.6	112697	68184.9	72959.8	118705	223295	2.10734e+06	78602.8	57422.7	9	44924.4	336645	54975.5	32553.5	223339	32915.1	121725	65431.4	812417	117341	1.36998e+07	4.21257e+07	7.37954e+07	220807	3.55038e+06	373156	35346.4	1.36998e+07	4.21257e+07	5.59418e+07	220807	3.55038e+06	373156	41295.2	41295.2	1.59466e+07
HFD_L7	248383	174853	9	966242	22934.7	172474	2.5183e+06	1.89564e+06	191937	48186.2	301114	95219.4	169029	22530.7	124532	187264	118380	189389	257012	3.20951e+06	218569	82067.6	9	396561	861031	94419.8	28444.9	235569	52455.8	91203.8	42110.2	1.3677e+06	326071	1.36702e+07	6.43253e+07	7.33565e+07	301114	3.51964e+06	439462	43962.6	1.36702e+07	6.43253e+07	6.02221e+07	301114	3.51964e+06	439462	33901.8	33901.8	1.42774e+07
HFD_H1	154686	38432.4	91019.4	972977	18143.8	114669	1.07671e+06	1.02972e+06	82108	16701	145286	29285.6	119557	30536.4	64672.8	73501.1	53260.2	114038	250354	2.8261e+06	72346.2	53763.2	9	105773	398135	85577.8	33328.4	214546	9	94843.6	46044.5	666654	123295	1.38945e+07	4.46045e+07	7.57625e+07	145286	2.55321e+06	763844	39048.2	1.38945e+07	4.46045e+07	5.9377e+07	145286	2.55321e+06	763844	27184.8	27184.8	1.63828e+07
HFD_H2	196219	91661.6	112386	1.067e+06	15109.2	87573.9	1.00066e+06	2.06576e+06	92206.2	21292.3	194547	42584.3	156467	35366.3	102478	88762	75787.1	154035	278091	2.98005e+06	92049.1	76328.4	9	96769.5	321108	85438.6	55083.7	155701	28187.6	71217.5	51774.9	1.60312e+06	113554	1.39535e+07	4.41898e+07	7.81643e+07	194547	3.17615e+06	452921	30421.6	1.39535e+07	4.41898e+07	6.03688e+07	194547	3.17615e+06	452921	42854.2	42854.2	2.00807e+07
HFD_H4	188052	71665.7	62696.5	992102	16271.4	106009	2.23985e+06	768850	80710.5	14916.2	198034	46522	118452	32307.5	97335.3	116087	58203.8	106916	242513	2.17512e+06	62485.3	53970.7	9	218675	385841	79063	29818.2	108048	9	91394.1	33270.5	596468	229527	1.33674e+07	4.72168e+07	7.56755e+07	198034	2.67479e+06	295915	46735.7	1.33674e+07	4.72168e+07	5.5647e+07	198034	2.67479e+06	295915	28604.5	28604.5	1.52651e+07
HFD_H5	116988	44295.6	84966.6	969179	18348.9	109505	1.90195e+06	1.12167e+06	53004.6	17892.2	266350	40941.2	136332	28759.1	75450.6	90173.1	52452.8	120794	187933	2.13458e+06	58826.7	63983.1	9	158156	441903	82826.6	31200.9	179556	9	83150.3	59331.6	728738	194742	1.33096e+07	5.60221e+07	71284620	266350	3.56999e+06	434202	26524.8	1.33096e+07	5.60221e+07	6.00975e+07	266350	3.56999e+06	434202	36738.1	36738.1	1.63094e+07
HFD_H6	173810	82816.5	63849.5	992963	12005.3	47599.6	1.2655e+06	1.40028e+06	93580.5	9	193150	33306.3	117224	31275	72627.8	75141.3	59780.7	112596	266389	2.52727e+06	46984	63511.6	9	142328	527328	74955.2	40800.6	123982	9	43906.4	57802.5	983501	147510	1.32875e+07	4.42198e+07	7.50282e+07	193150	3.63925e+06	384669	31806.6	1.32875e+07	4.42198e+07	5.77563e+07	193150	3.63925e+06	384669	40909.3	40909.3	1.62573e+07
HFD_H7	109586	88007.2	52091.8	1.00245e+06	15125.5	133271	2.50456e+06	1.52939e+06	100826	32186.8	187860	62033.3	102234	30990.4	101196	48567.9	63734.9	134405	183969	1.42721e+06	71524.4	51203.4	9	75053.3	339622	85219.8	17137.9	76035.4	22797	67474	39501.2	1.42621e+06	195503	1.2573e+07	4.04181e+07	7.72446e+07	187860	3.31034e+06	466659	37879.5	1.2573e+07	4.04181e+07	5.86341e+07	187860	3.31034e+06	466659	36345.2	36345.2	1.19464e+07
HFD_H8	87070.1	55555.1	44922.7	957035	14698.6	116963	711387	837393	52281.8	11534.3	125442	35325.5	121495	6108.66	94614.7	60661.5	58230.2	86240	186340	1.68447e+06	47815.7	45416.5	7326.62	202536	339886	69277	34244.1	111967	9	80516	37794.5	556799	94711.9	8.18979e+06	2.95164e+07	6.67975e+07	125442	2.65912e+06	248089	25711	8.18979e+06	2.95164e+07	5.38991e+07	125442	2.65912e+06	248089	33515	33515	1.08694e+07
[truncated: 16 more columns]
