# Supplementary figures and images for: A Novel Symbiotic Formulation Reduces Obesity and Concomitant Metabolic Syndrome in Rats by Raising the Relative Abundance of Blautia
Source: MDPI journal article supplement (doi:10.3390/nu15040956), 2023-02-14

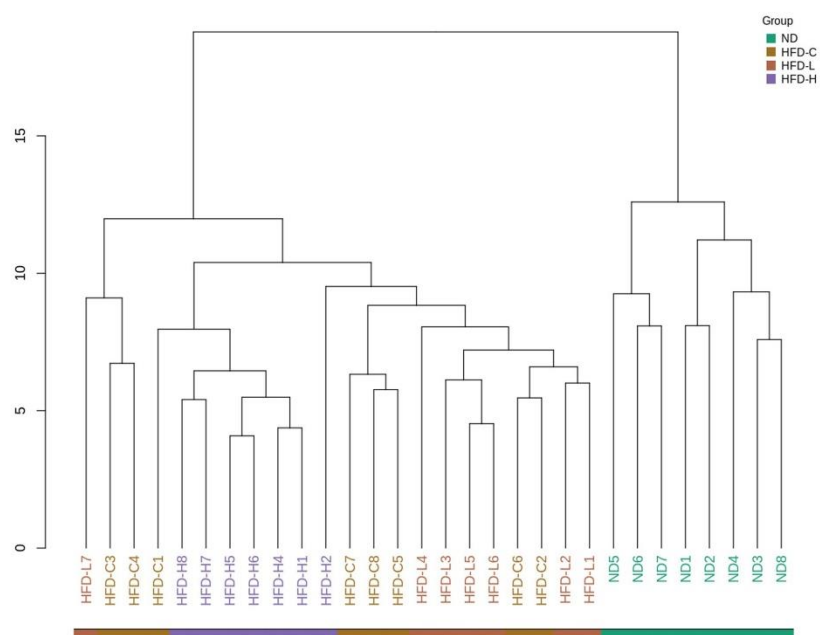

**FigureS3.** Tree analysis of all samples.

Supplement: s1 [file s1]
